# Supplementary material for: Hapten synthesis and a colloidal gold immunochromatographic strip assay to detect nitrofen and bifenox in fruits
Source: Royal Society of Chemistry journal article supplement (doi:10.1039/d3an00358b), 2023-01-01
Supplement: d3an00358b1.pdf [file d3an00358b1.pdf]

## *Supporting information*

### **Hapten Synthesis and a Colloidal Gold**

### **Immunochromatographic Strip Assay to Detect Nitrofen and Bifenox in Fruits**

Peng Wang<sup>1,2,3</sup>, Xinxin Xu<sup>1,2,3</sup>, Lingling Guo<sup>1,2,3</sup>, Liqiang Liu<sup>1,2,3</sup>, Hua Kuang<sup>1,2,3</sup>, Jing Xiao<sup>b\*</sup>,  
Chuanlai Xu<sup>1,2,3\*</sup>

<sup>1</sup>State Key Laboratory of Food Science and Technology, Jiangnan University; <sup>2</sup>International Joint Research Laboratory for Biointerface and Biodetection and School of Food Science and Technology, Jiangnan University; <sup>3</sup>Collaborative Innovation center of Food Safety and Quality Control in Jiangsu Province, Jiangnan University, Wuxi, Jiangsu, 214122, People's Republic of China; <sup>4</sup>NHC Key Laboratory of Food Safety Risk Assessment, China National Center for Food Safety Risk Assessment, Beijing, People's Republic of China;

\*Corresponding author, Email: [xiaojing@cfsa.net.cn](mailto:xiaojing@cfsa.net.cn); [xcl@jiangnan.edu.cn](mailto:xcl@jiangnan.edu.cn);

**Fig. S1** Composition of the test strip (a) and the schematic for samples detection (b).

**Fig. S2** The mass spectrum of NIT-1. (a) The total ion current spectrum of NIT-1 (b) The signal strength of the NIT-1 and structure, (c) The mass spectrum of NIT-1.

**Fig. S3** The <sup>1</sup>H NMR test results of NIT-1.

**Fig. S4** The <sup>1</sup>H NMR test results of compound 3.

**Fig. S5** The mass spectrum of NIT-2. (a) The total ion current spectrum of NIT-1 (b) The signal strength of the NIT-2, (c) The mass spectrum of NIT-2.

**Fig. S6** The <sup>1</sup>H NMR test results of NIT-2.

**Fig. S7** Screening for successful pairs of coating antigen/serum. Criterion of success is  $\geq 50\%$  inhibition at 20 ng/mL NIT.

**Fig. S8** Five strains of antibodies were deficient in ic-ELISA standards for two pesticides when coated with different antigens. (a) and (c) The coated antigen was homologous. (b) and (d) The coated antigen was heterologous.

**Fig. S9** Optimize gold-labeled antibody resuspension.

**Table S1.** The titer of mAbs standard curve.

**Table S2.** The IC<sub>50</sub> values of mAbs.

**Table S3.** The affinity constant of mAb 5G7.

**Table S4.** Cross-reactivity of mAb with NIT and analogues.

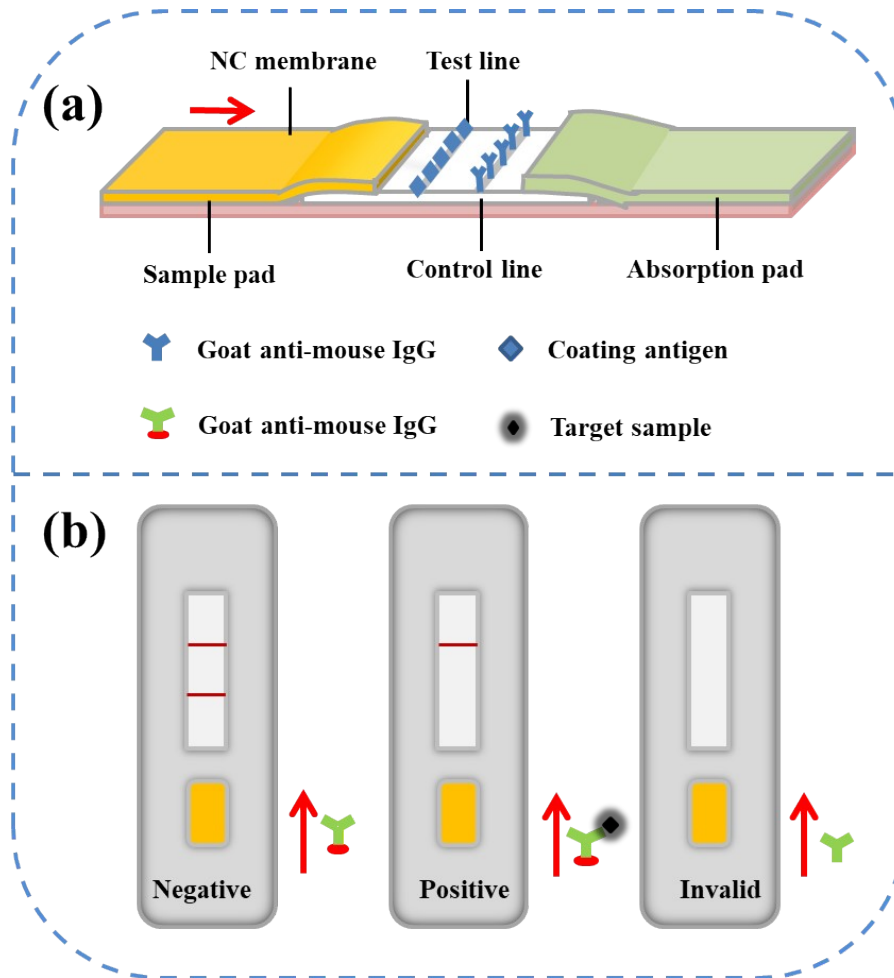

**Fig. S1** Composition of the test strip and the schematic for samples detection.

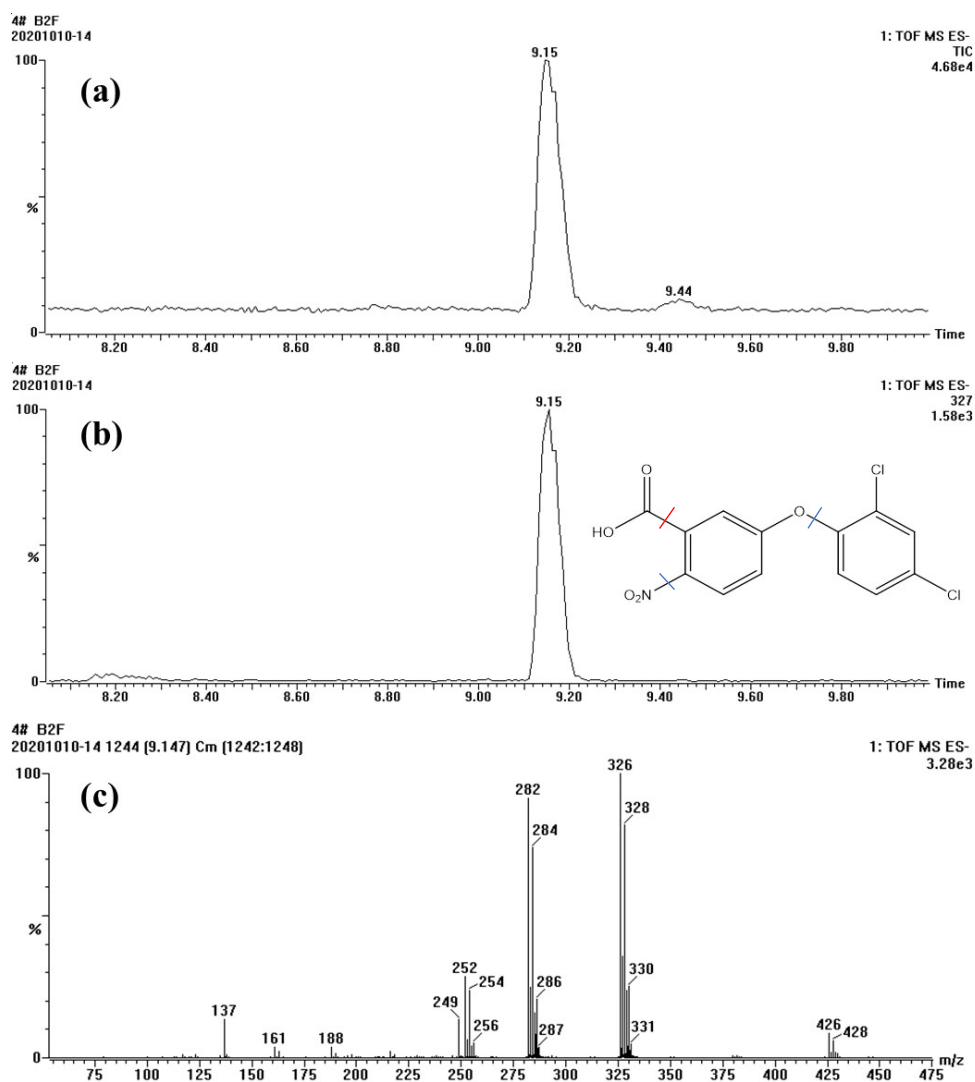

**Fig. S2** The mass spectrum of NIT-1. (a) The total ion current spectrum of NIT-1 (b) The signal strength of the NIT-1 and structure, (c) The mass spectrum of NIT-1.

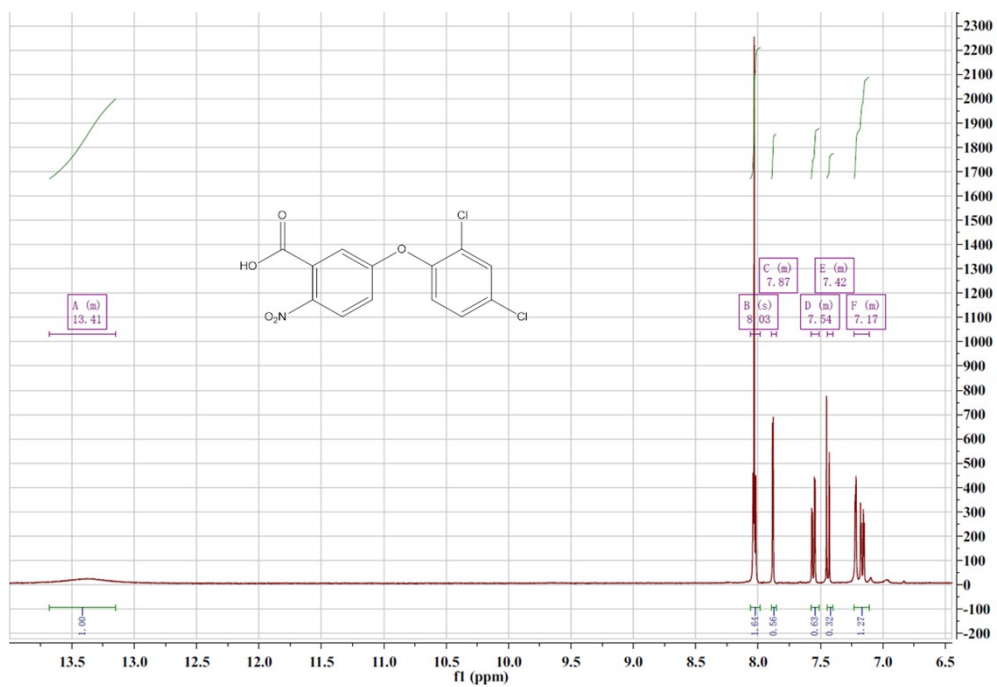

**Fig. S3** The  $^1\text{H}$  NMR test results of NIT-1.

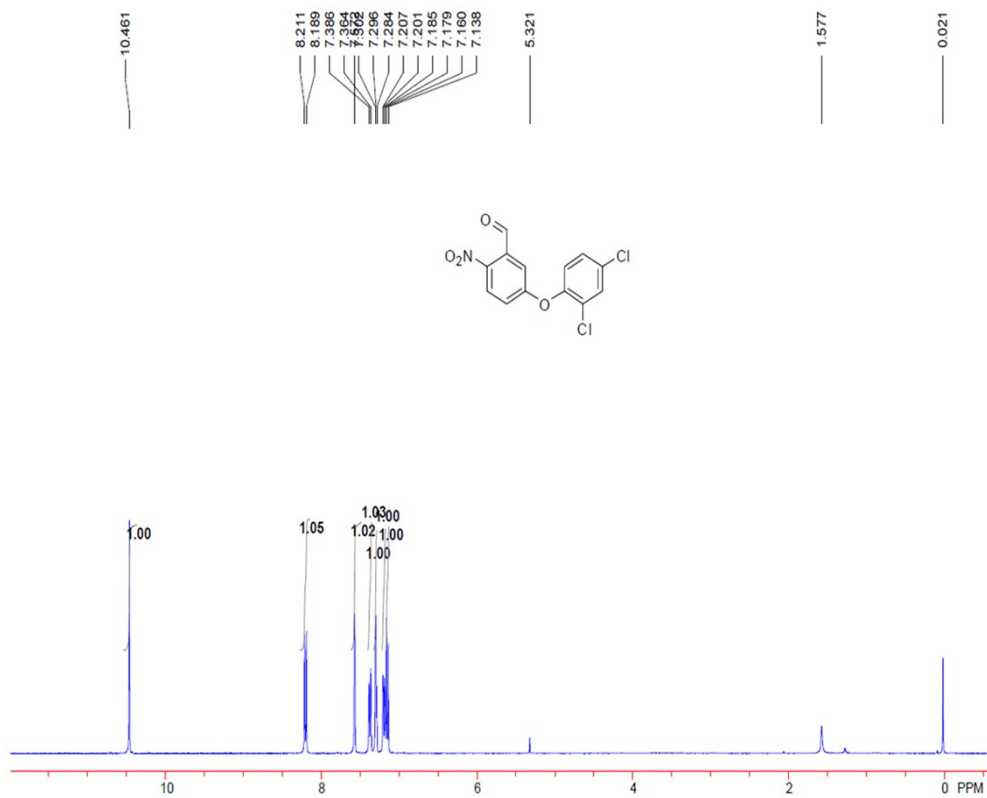

**Fig. S4** The  $^1\text{H}$  NMR test results of compound 3.

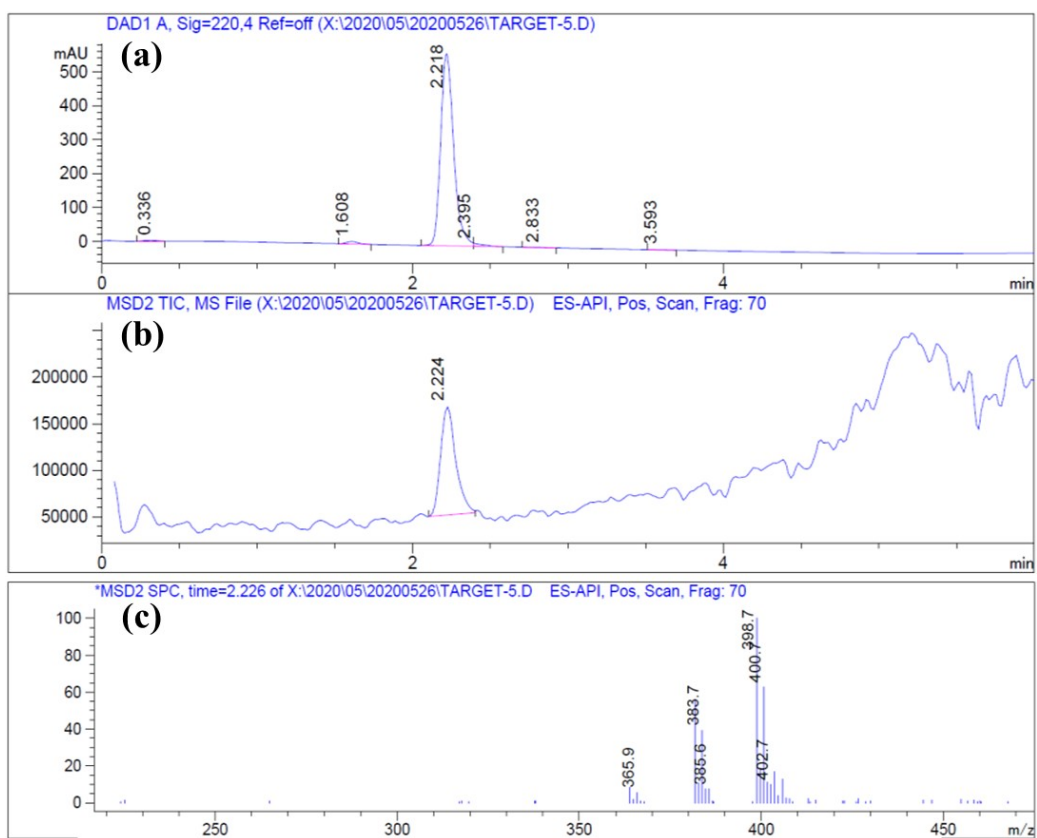

**Fig. S5** The mass spectrum of NIT-2. (a) The total ion current spectrum of NIT-1 (b) The signal strength of the NIT-2, (c) The mass spectrum of NIT-2.

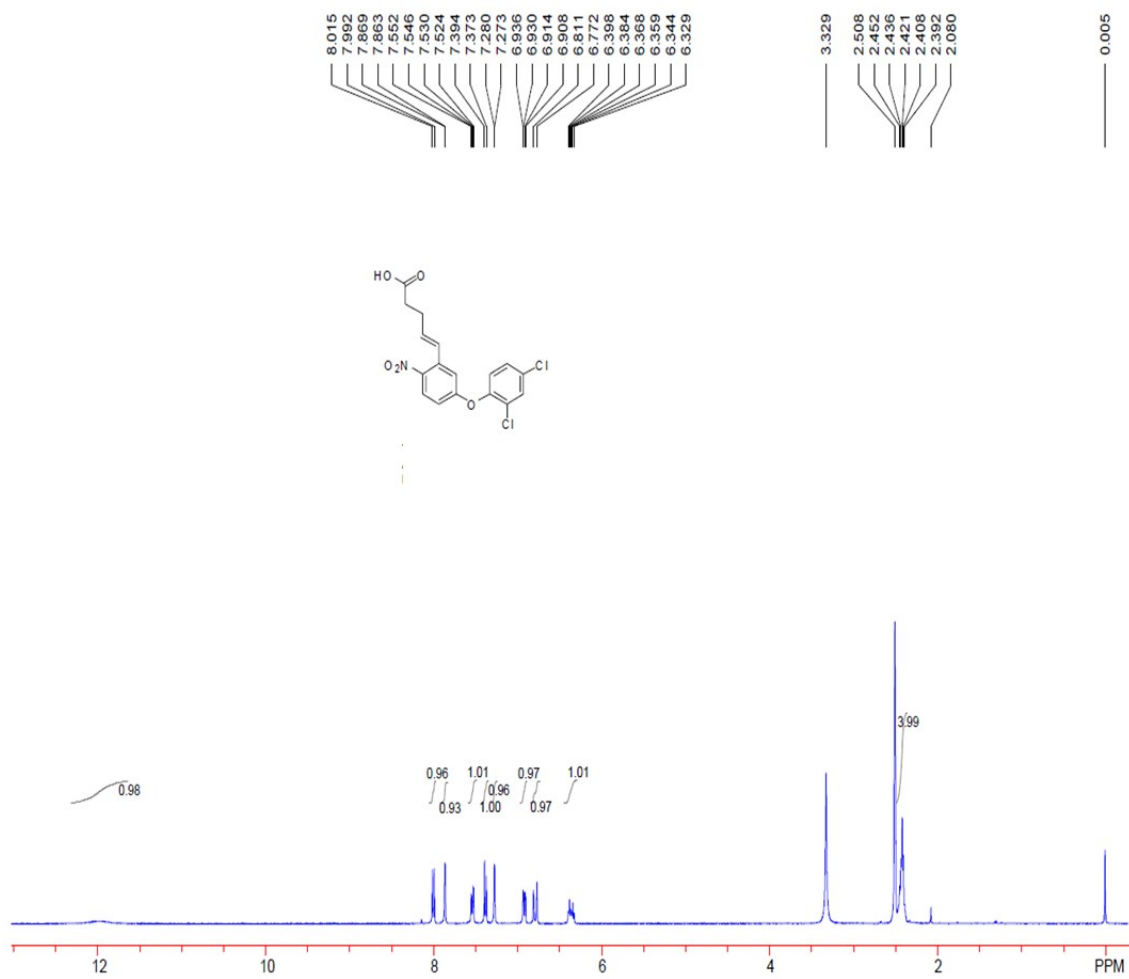

Fig. S6 The <sup>1</sup>H NMR test results of NIT-2

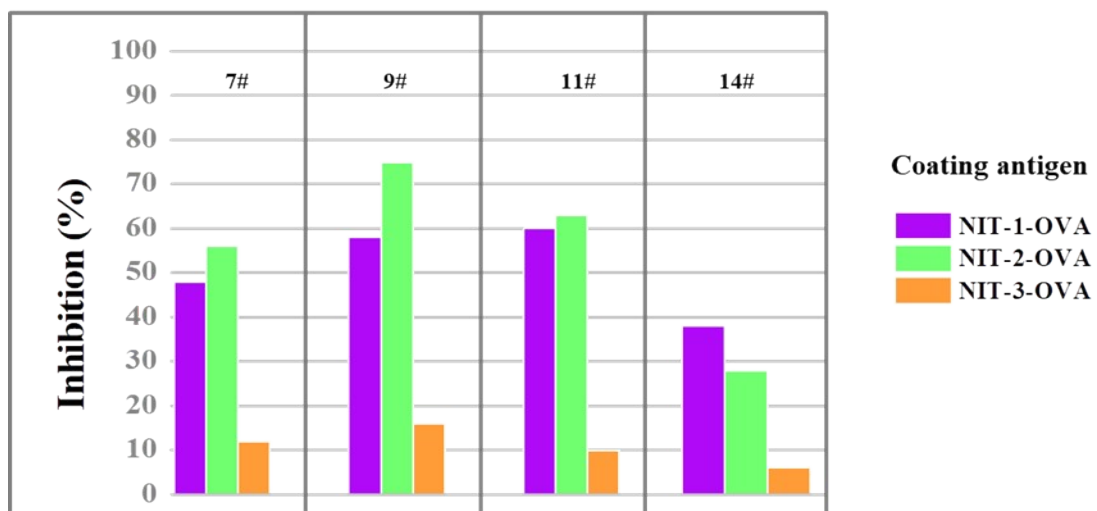

Fig. S7 Screening for successful pairs of coating antigen/serum. Criterion of success is  $\geq 50\%$  inhibition at 20 ng/mL NIT.

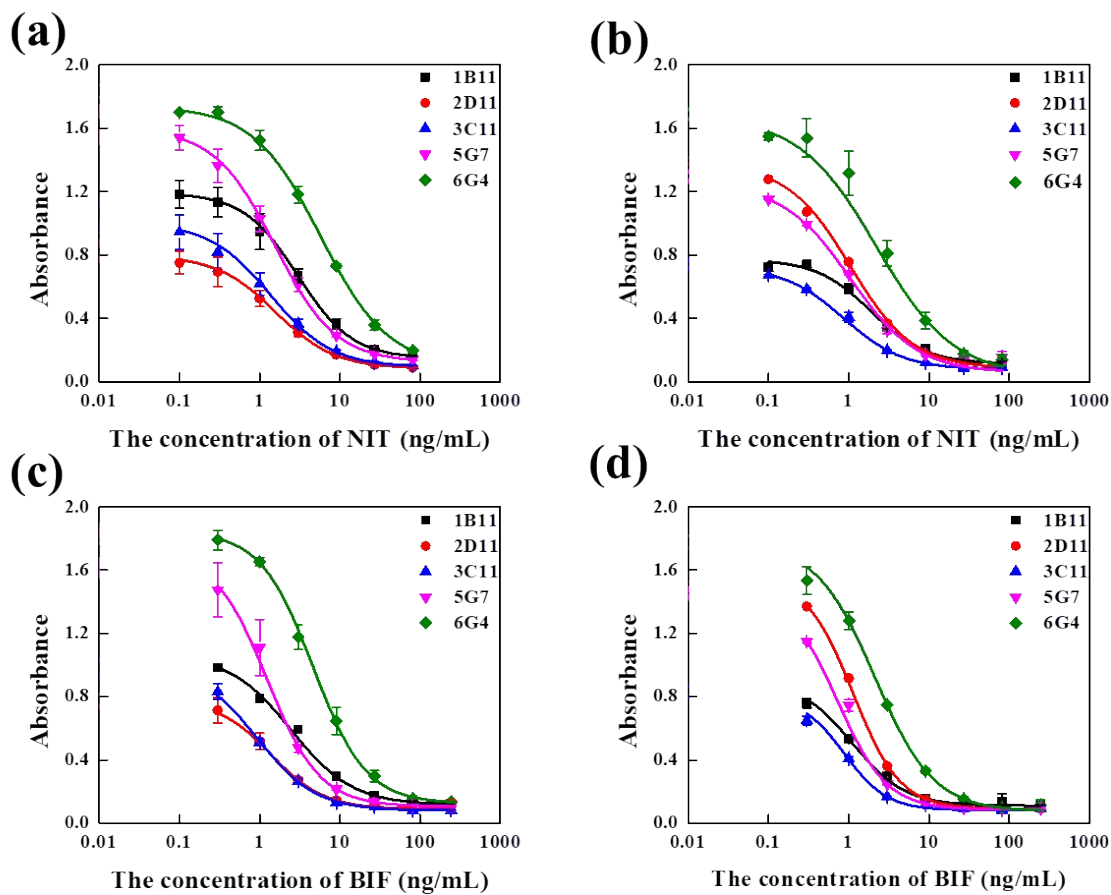

**Fig. S8** Five strains of antibodies were deficient in ic-ELISA standards for two pesticides when coated with different antigens. (a) and (c) The coated antigen was homologous. (b) and (d) The coated antigen was heterologous.

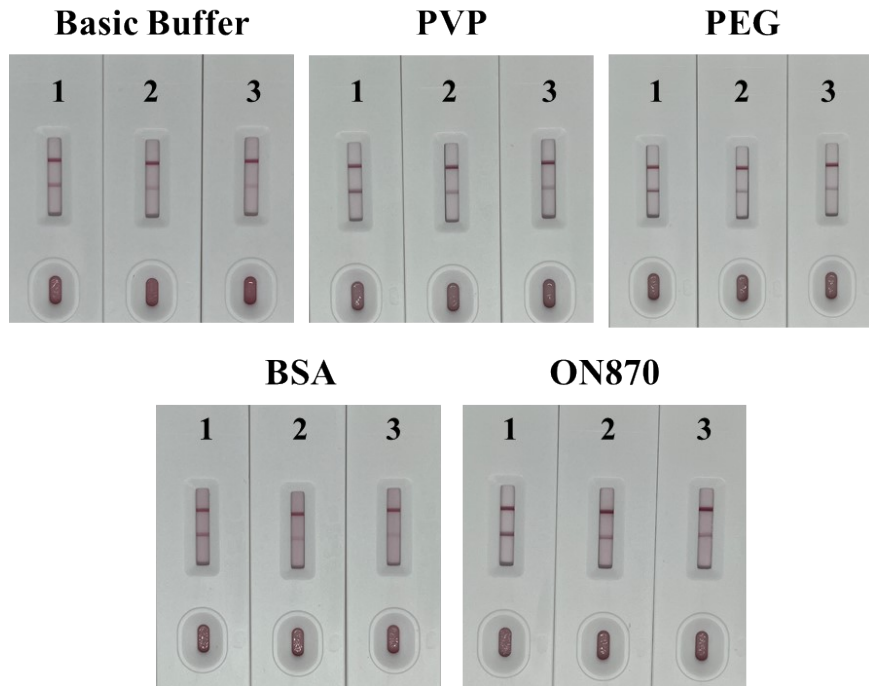

**Fig. S9** Optimize gold-labeled antibody resuspension.



**Table S1.** The titer of mAbs standard curve.

| Coating antigen<br>(0.1mg/mL) | NIT-1-BSA |      |      |      | NIT-1-ABSA |      |      |      | NIT-2-BSA |      |      |      | NIT-2-ABSA |      |      |      |    |
|-------------------------------|-----------|------|------|------|------------|------|------|------|-----------|------|------|------|------------|------|------|------|----|
|                               | 2#        |      | 3#   |      | 7#         |      | 9#   |      | 11#       |      | 14#  |      | 17#        |      | 18#  |      |    |
|                               | DF        |      | DF   |      | DF         |      | DF   |      | DF        |      | DF   |      | DF         |      | DF   |      |    |
|                               | 1000      | 9000 | 1000 | 9000 | 1000       | 9000 | 1000 | 9000 | 1000      | 9000 | 1000 | 9000 | 1000       | 9000 | 1000 | 9000 |    |
| NIT-1-OVA                     | +++       | +++  | +++  | +++  | +++        | +++  | +++  | +++  | +++       | +++  | ++   | +++  | ++         | ++   | +    | +    | +  |
| NIT-2-OVA                     | ++        | +    | +    | ++   | +++        | +++  | +++  | +++  | +++       | +++  | +++  | +++  | +++        | ++   | +    | ++   | ++ |
| NIT-3-OVA                     | +         | -    | -    | -    | +          | -    | +    | -    | +         | -    | +    | -    | -          | -    | -    | -    | -  |

Annotation : -, absorbance <0.8; +, absorbance 0.8-1.2; ++, absorbance 1.2-2.0; +++, absorbance >2.0; DF is short for dilution fold.

**Table S2.** The IC<sub>50</sub> values of mAbs.

| mAbs | Homologous coatings |             | Heterologous coatings |                |
|------|---------------------|-------------|-----------------------|----------------|
|      | BIF<br>(ng/mL)      | NIT (ng/mL) | BIF<br>(ng/mL)        | NIT<br>(ng/mL) |
| 1B11 | 2.98                | 2.46        | 1.89                  | 1.10           |
| 2D11 | 1.57                | 1.38        | 1.04                  | 1.12           |
| 3C11 | 1.35                | 0.92        | 0.86                  | 0.87           |
| 5G7  | 1.54                | 1.22        | 1.04                  | 0.73           |
| 6G4  | 5.76                | 4.64        | 2.20                  | 2.11           |

**Table S3.** The affinity constant of mAb 5G7.

| Antigen               | Affinity constant     |
|-----------------------|-----------------------|
| Homologous coatings   | 2.01×10 <sup>10</sup> |
| Heterologous coatings | 1.54×10 <sup>7</sup>  |

**Table S4.** Cross-reactivity of mAb with NIT and analogues.

| Chemical compound | Structure                                                                           | IC <sub>50</sub> (ng/mL) | Cross-reaction (%) |
|-------------------|-------------------------------------------------------------------------------------|--------------------------|--------------------|
| Nitrofen          | 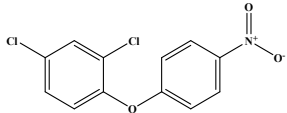 | 0.87                     | 100                |
| Bifenox           |  | 0.86                     | 101                |
| Oxyfluorfen       |  | >5                       | <11.8              |
| Acifluorfen       |  | >5                       | <11.8              |
| Fomesafen         |  | >5                       | <11.8              |

---

Lactofen

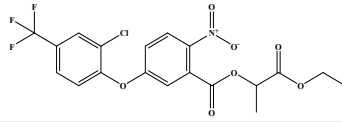

>5

<11.8

---
